# Supplementary material
Source: PubMed Central journal article supplement (PMC7038281)
Supplement: AAC.01677-19-s0001.pdf [file AAC.01677-19-s0001.pdf]

## SUPPLEMENTAL DATA

**Table S1: Bacterial strains used in this study**

| Strain                                                  | Genotype and relevant phenotype                                         | Source or Reference                        |
|---------------------------------------------------------|-------------------------------------------------------------------------|--------------------------------------------|
| <i>Acinetobacter baumannii</i> 17978                    | Wild type; polymyxin sensitive                                          | ATCC®17978™                                |
| <i>Acinetobacter baumannii</i> 17978R2                  | 17978 <i>pmrB</i> (T235I); polymyxin resistant                          | 1                                          |
| <i>Acinetobacter baumannii</i> AABA1205                 | Clinical isolate; polymyxin resistant                                   | 2                                          |
| <i>Bacillus subtilis</i> 168                            | Wild type ind <sup>-</sup> tyr <sup>+</sup>                             | ATCC®23857™                                |
| <i>Enterobacter cloacae</i> RS/WT                       | Clinical isolate; polymyxin heteroresistant                             | 3                                          |
| <i>Enterococcus faecium</i> 19434                       | Wild type                                                               | ATCC®19434™                                |
| <i>Escherichia coli</i> W3110                           | Wild type F <sup>-</sup> λ <sup>-</sup> ; polymyxin sensitive           | <i>E. coli</i> Genetic Stock Center (Yale) |
| <i>Escherichia coli</i> WD101                           | W3110 <i>pmrA</i> <sup>C</sup> ; polymyxin resistant                    | 4                                          |
| <i>Escherichia coli</i> WBBO6                           | W3110 Δ( <i>rfaC-rfaF</i> ):: <i>tet6</i> ; polymyxin sensitive         | 5                                          |
| <i>Escherichia coli</i> W3LPTD                          | W3110 <i>lptD</i> 4213 <i>carB</i> :: <i>Tn10</i> ; polymyxin sensitive | This study                                 |
| <i>Escherichia coli</i> WDLPXC                          | WD101 <i>lpxC101 leuB</i> :: <i>Tn10</i> ; polymyxin resistant          | This study                                 |
| <i>Klebsiella pneumoniae</i> Lab C-26233                | Clinical isolate; polymyxin sensitive                                   | 6                                          |
| <i>Klebsiella pneumoniae</i> ST258 RH201207             | Clinical isolate; polymyxin resistant                                   | 7                                          |
| <i>Klebsiella pneumoniae</i> NR05083                    | Clinical isolate; polymyxin resistant                                   | A.C. Uhlemann                              |
| <i>Pseudomonas aeruginosa</i> PA14                      | Wild type; polymyxin sensitive                                          | 8                                          |
| <i>Pseudomonas aeruginosa</i> PA14BNQ                   | PA14 <i>phoQ</i> :: <i>xyIE-aacCI</i> ; polymyxin resistant             | 9                                          |
| <i>Staphylococcus aureus</i> subsp. <i>aureus</i> 12600 | Wild type; methicillin sensitive                                        | ATCC®12600™                                |
| <i>Staphylococcus aureus</i> subsp. <i>aureus</i> MU50  | Wild type; methicillin resistant                                        | ATCC®700699™                               |

**Table S2: Lead compounds used in this study**

| Compound ID | Maybridge ID | Molecular Weight (g/mol) | Formula                                                                        | IUPAC Nomenclature                                                                      | # Chiral Centers | # Rotatable Bonds | logP | logD [pH=7] |
|-------------|--------------|--------------------------|--------------------------------------------------------------------------------|-----------------------------------------------------------------------------------------|------------------|-------------------|------|-------------|
| 5           | HTS 03780    | 404.33                   | C <sub>17</sub> H <sub>10</sub> F <sub>6</sub> N <sub>2</sub> OS               | 3-(1-benzothiophen-2-yl)-1-[3,5-bis(trifluoromethyl)phenyl]urea                         | 0                | 4                 | 5.92 | 5.92        |
| 8           | MGH 00136    | 291.69                   | C <sub>13</sub> H <sub>10</sub> ClN <sub>3</sub> O <sub>3</sub>                | 3-(4-chloro-2-nitrophenyl)-1-phenylurea                                                 | 0                | 3                 | 3.66 | 3.66        |
| 33          | NH 00518     | 221.10                   | C <sub>7</sub> H <sub>6</sub> Cl <sub>2</sub> N <sub>2</sub> S                 | N-amino-3,5-dichlorobenzene-1-carbothioamide                                            | 0                | 1                 | 2.63 | 2.63        |
| 43          | CD 04455     | 383.58                   | C <sub>14</sub> H <sub>8</sub> Cl <sub>3</sub> F <sub>3</sub> N <sub>2</sub> O | 2,4-dichloro-6-[5-chloro-6-(trifluoromethyl)-2,3-dihydro-1H-1,3-benzodiazol-2-yl]phenol | 1                | 2                 | 3.12 | 4.88        |
| 44          | JP 00319     | 292.16                   | C <sub>15</sub> H <sub>11</sub> Cl <sub>2</sub> NO                             | (2E)-N-(3-chlorophenyl)-3-(4-chlorophenyl)prop-2-enamide                                | 0                | 3                 | 4.78 | 4.78        |

**Table S3: Lead compounds demonstrate synergy with polymyxin B against diverse polymyxin-resistant Gram-negative bacterial species.** The MIC of polymyxin was determined in various Gram-negative bacterial strains using PMB E-test strips on CAMHA plates containing 20  $\mu$ M of each of the 5 lead compounds, and fold change reductions were calculated. Representative data from at least two biologic replicates are shown.

| Isolates                                                      | PMB                  | 20 $\mu$ M Compound + PMB |                             |                      |                             |                      |                             |                      |                             |                      |                             |
|---------------------------------------------------------------|----------------------|---------------------------|-----------------------------|----------------------|-----------------------------|----------------------|-----------------------------|----------------------|-----------------------------|----------------------|-----------------------------|
|                                                               |                      | 5                         |                             | 8                    |                             | 33                   |                             | 43                   |                             | 44                   |                             |
|                                                               | MIC<br>( $\mu$ g/mL) | MIC<br>( $\mu$ g/mL)      | Synergy<br>(Fold $\Delta$ ) | MIC<br>( $\mu$ g/mL) | Synergy<br>(Fold $\Delta$ ) | MIC<br>( $\mu$ g/mL) | Synergy<br>(Fold $\Delta$ ) | MIC<br>( $\mu$ g/mL) | Synergy<br>(Fold $\Delta$ ) | MIC<br>( $\mu$ g/mL) | Synergy<br>(Fold $\Delta$ ) |
| <i>Escherichia coli</i> W3110, PMB <sup>S</sup>               | 0.125                | 0.125                     | 1                           | 0.125                | 1                           | 0.125                | 1                           | 0.125                | 1                           | 0.125                | 1                           |
| <i>Escherichia coli</i> WD101, PMB <sup>R</sup>               | 3-4                  | 0.125                     | 24                          | 0.19                 | 16                          | 2                    | 1.5                         | 3                    | 1                           | 1.5                  | 2                           |
| <i>Acinetobacter baumannii</i> 17978, PMB <sup>S</sup>        | 0.19                 | 0.125                     | 1.5                         | 0.125                | 1.52                        | 0.125                | 1.5                         | 0.19                 | 1                           | 0.19                 | 1                           |
| <i>Acinetobacter baumannii</i> 17978R2, PMB <sup>R</sup>      | 12                   | 0.19                      | 63                          | 0.5                  | 24                          | 2                    | 6                           | 12                   | 1                           | 12                   | 1                           |
| <i>Acinetobacter baumannii</i> AABA1205, PMB <sup>R</sup>     | 64                   | 1.5                       | 43                          | 1.5                  | 43                          | 32                   | 2                           | 64                   | 1                           | 64                   | 1                           |
| <i>Klebsiella pneumoniae</i> Lab C-26233, PMB <sup>S</sup>    | 0.19                 | 0.125                     | 1.5                         | 0.19                 | 1                           | 0.19                 | 1                           | 0.19                 | 1                           | 0.19                 | 1                           |
| <i>Klebsiella pneumoniae</i> ST258 RH201207, PMB <sup>R</sup> | 2                    | 0.38                      | 5.3                         | 0.5                  | 4                           | 0.5                  | 4                           | 1                    | 2                           | 1                    | 2                           |
| <i>Klebsiella pneumoniae</i> NR05083, PMB <sup>R</sup>        | 3                    | 0.25                      | 12                          | 0.25                 | 12                          | 0.5                  | 6                           | 1                    | 3                           | 1                    | 3                           |
| <i>Pseudomonas aeruginosa</i> PA14, PMB <sup>S</sup>          | 0.5                  | 0.38                      | 1.3                         | 0.5                  | 1                           | 0.25                 | 2                           | 0.25                 | 2                           | 0.38                 | 1.3                         |
| <i>Pseudomonas aeruginosa</i> PA14BNQ, PMB <sup>R</sup>       | 8                    | 0.5                       | 16                          | 2                    | 4                           | 6                    | 1.3                         | 3                    | 2.7                         | 4                    | 2                           |

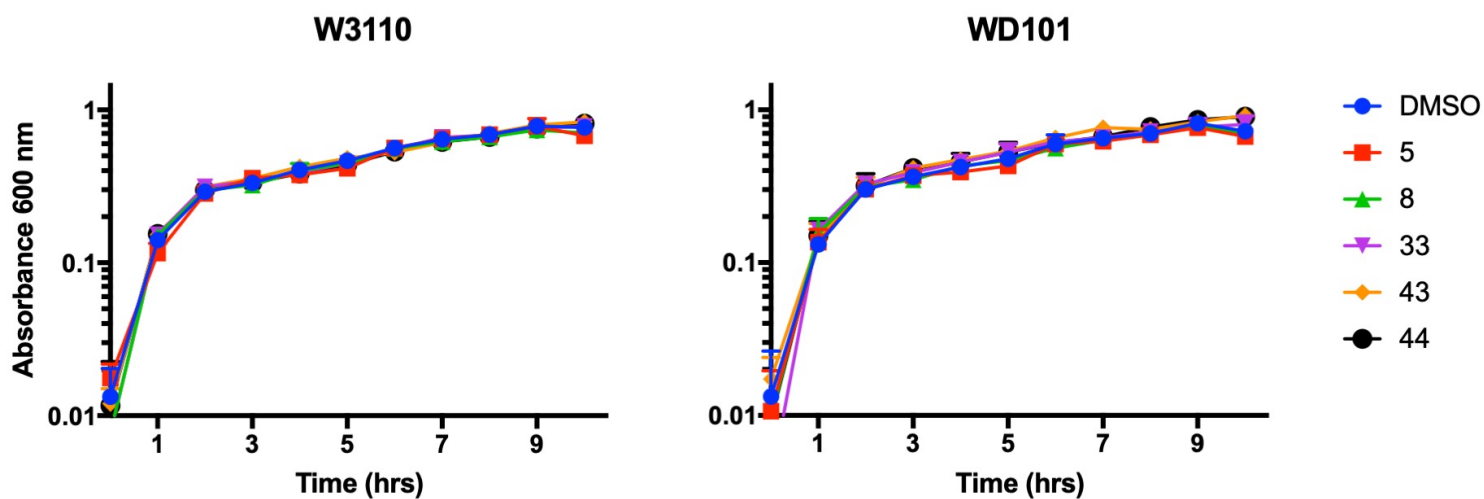

**Figure S1: Lead compounds do not affect *E. coli* growth.** Representative data from at least two biological replicates was generated using broth microdilution assays.

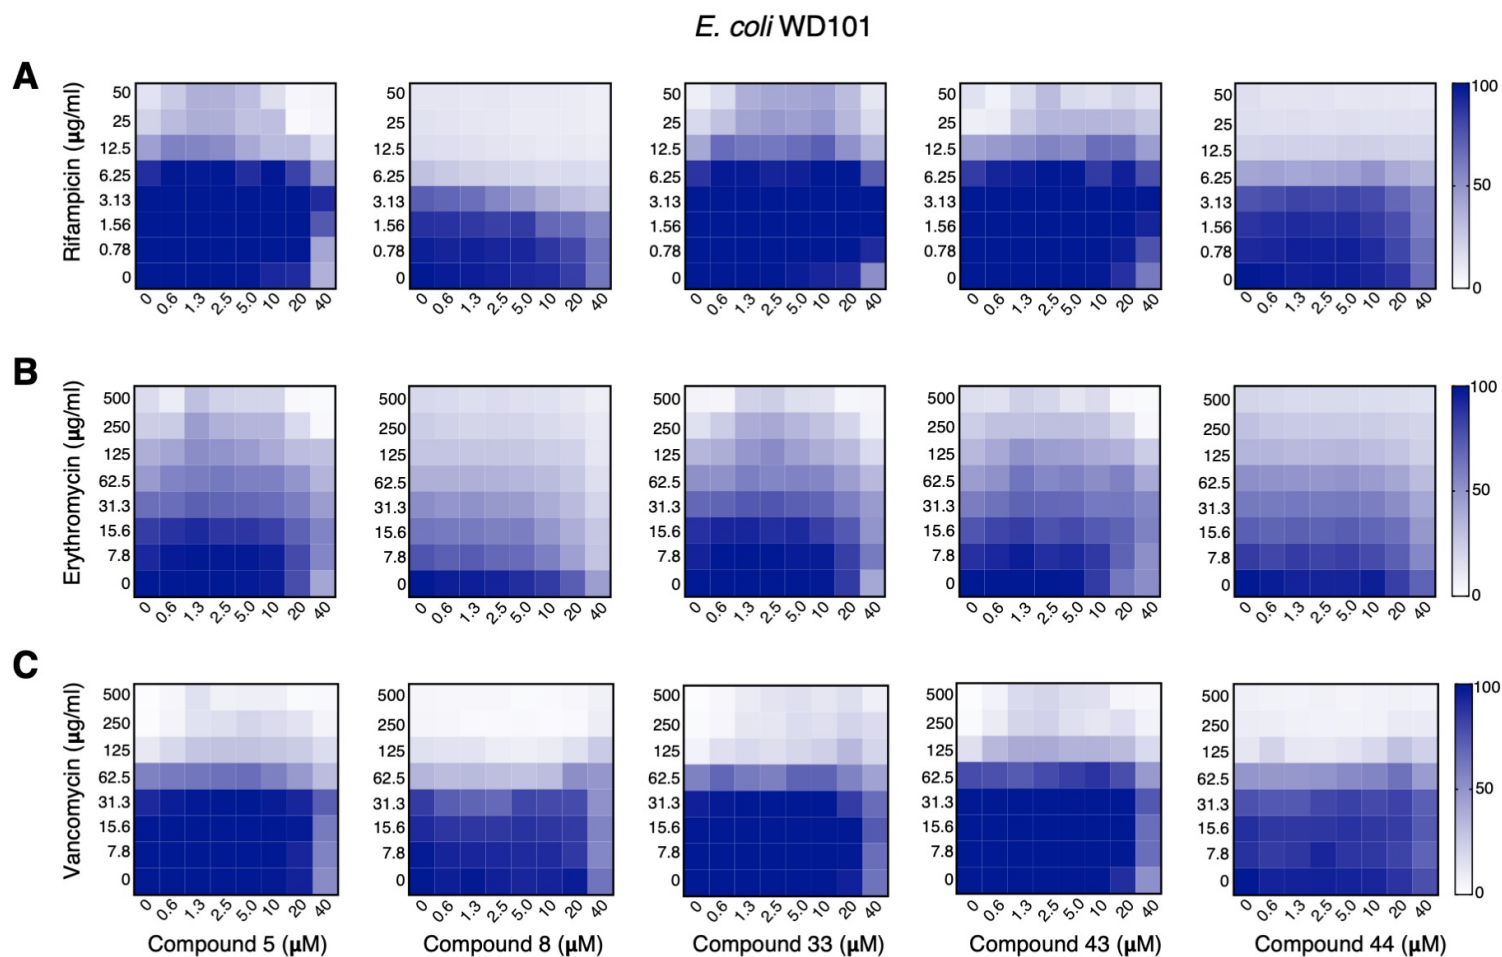

**Figure S2. The synergistic activity of lead compounds is specific to polymyxin.** Checkerboard broth microdilution assays performed with *E. coli* WD101 (*pmrA* constitutive mutant) to examine the synergy potential of the 5 lead compounds and **A**) rifampicin, **B**) erythromycin, and **C**) vancomycin. Percent bacterial growth is demonstrated via heat maps. Representative data from at least two biological replicates are presented.

*A. baumannii* AABA1205

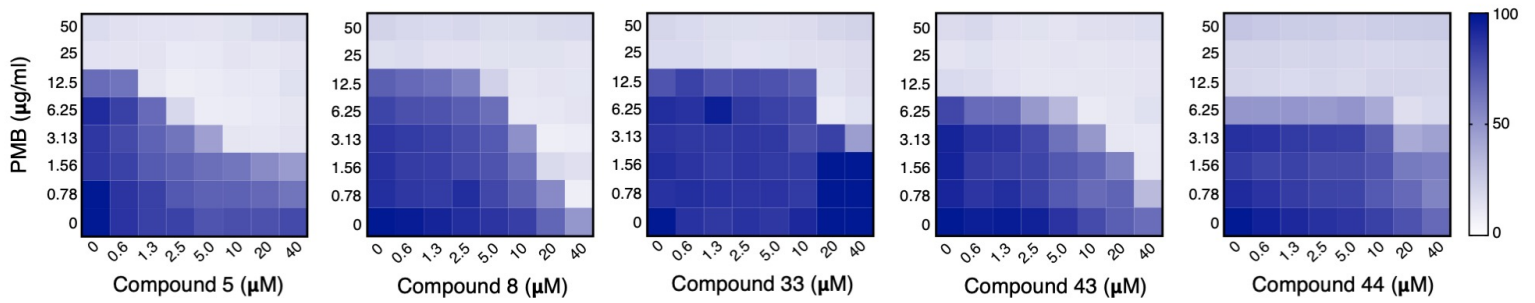

**Figure S3: Compounds act synergistically with polymyxin B against a highly colistin-resistant *Acinetobacter baumannii* clinical isolate.** Checkerboard broth microdilution assays performed with *A. baumannii* AABA1205 demonstrate synergy between the 5 lead compounds and PMB at varying concentrations. Representative data from at least two biologic replicates are presented, and the heat map shows percent bacterial growth.

### A Compounds only

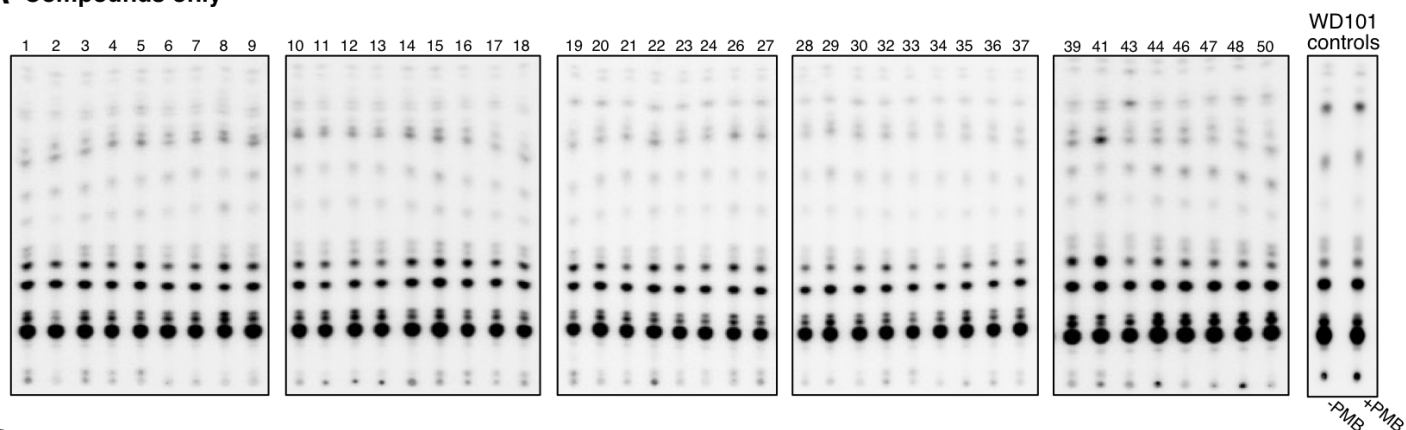

### B Compounds + PMB

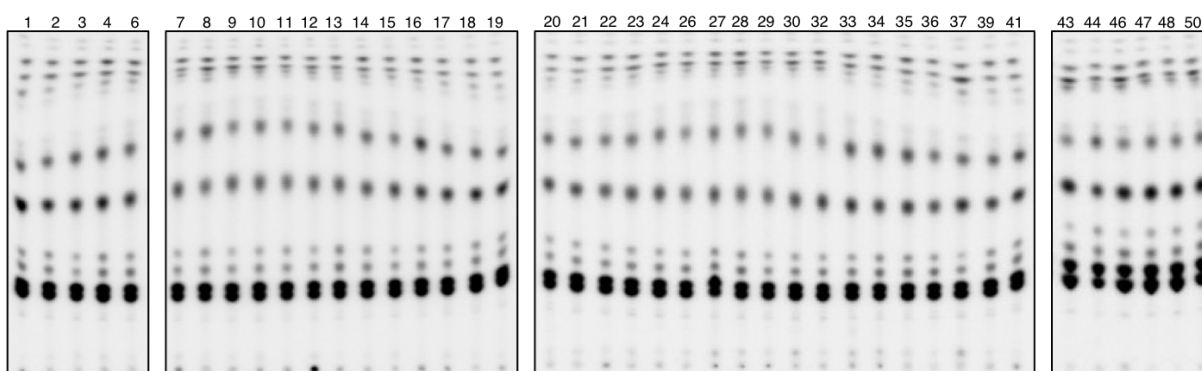

**Figure S4: Lipid A modifications are not altered in *E. coli* treated alone or in combination with compounds.** <sup>32</sup>P-labeled lipid A species isolated from *E. coli* grown under different conditions are shown. *E. coli* WD101 (*pmrA* constitutive mutant) is used as a control for PmrA-mediated lipid A modifications. **A)** Bacterial cells were grown in LB broth supplemented with 2% DMSO and 15  $\mu$ M of each compound of interest. **B)** Bacterial cells were grown in LB broth supplemented with 2% DMSO, 0.5  $\mu$ g/mL PMB, and 10  $\mu$ M of each compound of interest.

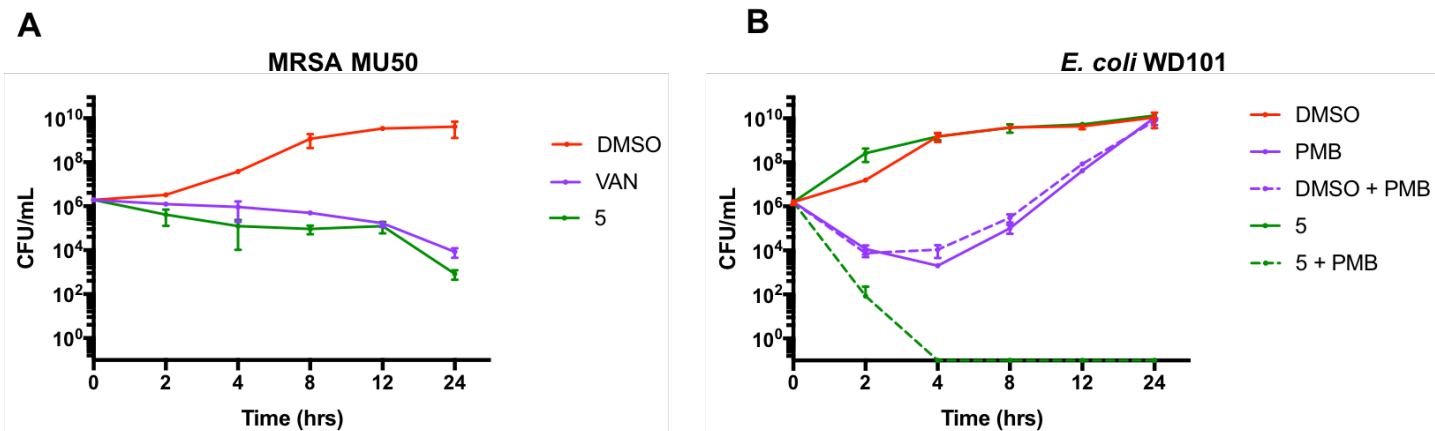

**Figure S5: At low concentrations compound 5 exhibits potent bactericidal activity. A)** Time-kill curves for 0.625  $\mu\text{M}$  of compound 5 against vancomycin-intermediate MRSA MU50 demonstrated killing comparable to vancomycin with bactericidal activity ( $\geq 3 \log_{10}$  reduction in CFU/mL) achieved at 24 hours. **B)** Time-kill curves for 2.5  $\mu\text{M}$  of compound 5 with and without 2.5  $\mu\text{g/mL}$  PMB against polymyxin-resistant *E. coli* WD101 (*pmrA<sup>c</sup>*) demonstrates synergistic bactericidal activity and complete bacterial killing achieved at 4 hours. For all data sets, representative data from at least two biologic replicates are shown.



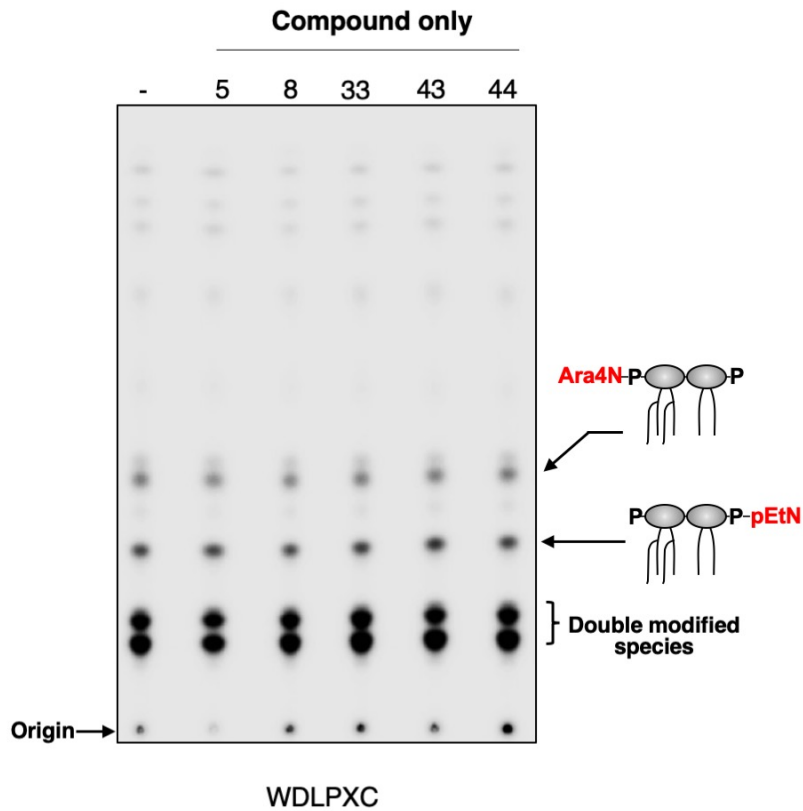

**Figure S6. Lead compounds do not alter existing lipid A modifications in *E. coli* with outer membrane defects.**  $^{32}\text{P}$ -labeled lipid A species isolated from *E. coli* WDLPXC (*pmrA<sup>c</sup> lpxC101*) grown under different conditions are shown. Bacterial cells were grown in LB broth supplemented with 2% DMSO and 1.0  $\mu\text{M}$  of each compound.

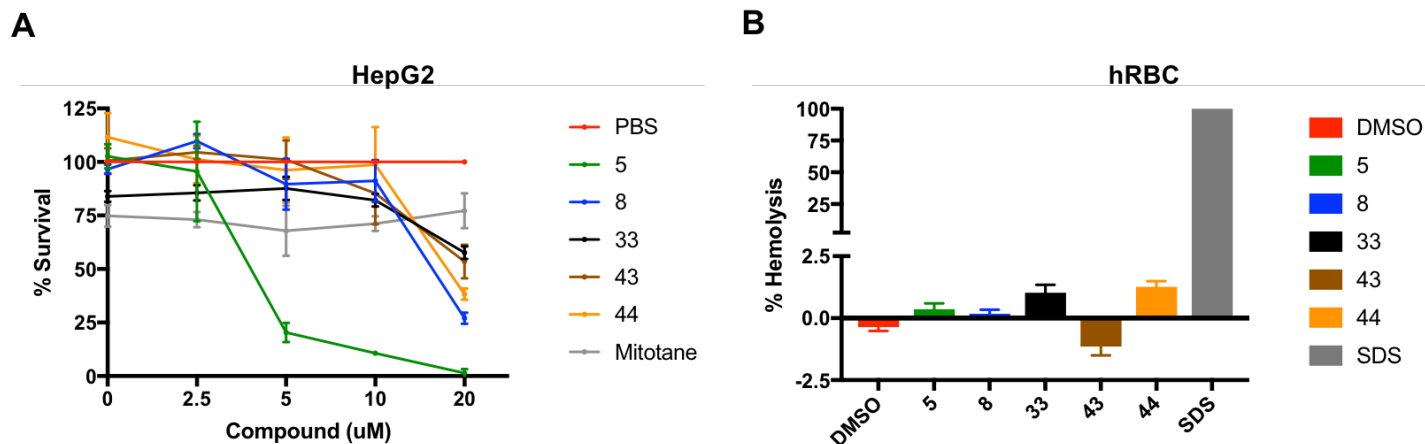

**Figure S7: Lead compounds only exhibit hepatotoxicity at high concentrations and are not hemolytic. A)** MTT cytotoxicity assay with washed HepG2 cells demonstrates that at  $\leq 2.5 \mu\text{M}$ , all of the lead compounds are less toxic to human hepatocytes than mitotane, with some compounds (8, 33, 43, and 44) demonstrating minimal toxicity up to  $10 \mu\text{M}$ . **B)** Hemolysis assay with washed human red blood cells (hRBC) and  $40 \mu\text{M}$  of compound demonstrates that these compounds have little, if any, hemolytic activity after 3 hrs. These assays were performed at multiple concentrations (up to  $40 \mu\text{M}$ ) and at both 45 min (not shown) and 3 hrs (shown). For all data sets, representative data from at least two biologic replicates are shown.

## References

1. Arroyo LA, Herrera CM, Fernandez L, Hankins JV, Trent MS, Hancock RE. 2011. The pmrCAB operon mediates polymyxin resistance in *Acinetobacter baumannii* ATCC 17978 and clinical isolates through phosphoethanolamine modification of lipid A. *Antimicrobial agents and chemotherapy* 55:3743–3751.
2. Crittenden CM, Herrera CM, Williams PE, Ricci DP, Swem LR, Trent MS, Brodbelt JS. 2018. Mapping phosphate modifications of substituted lipid A via a targeted MS(3) CID/UVPD strategy. *Analyst* 143:3091–3099.
3. Band VI, Crispell EK, Napier BA, Herrera CM, Tharp GK, Vavikolanu K, Pohl J, Read TD, Bosinger SE, Trent MS, Burd EM, Weiss DS. 2016. Antibiotic failure mediated by a resistant subpopulation in *Enterobacter cloacae*. *Nature Microbiology* 1:16053.
4. Herrera CM, Hankins JV, Trent MS. 2010. Activation of PmrA inhibits LpxT-dependent phosphorylation of lipid A promoting resistance to antimicrobial peptides. *Molecular microbiology* 76:1444–1460.
5. Brabetz W, Muller-Loennies S, Holst O, Brade H. 1997. Deletion of the heptosyltransferase genes rfaC and rfaF in *Escherichia coli* K-12 results in an Re-type lipopolysaccharide with a high degree of 2-aminoethanol phosphate substitution. *European journal of biochemistry* 247:716–724.
6. Greco I, Emborg AP, Jana B, Molchanova N, Oddo A, Damborg P, Guardabassi L, Hansen PR. 2019. Characterization, mechanism of action and optimization of activity of a novel peptide-peptoid hybrid against bacterial pathogens involved in canine skin infections. *Sci Rep* 9:3679–3679.
7. Jana B, Cain AK, Doerrler WT, Boinett CJ, Fookes MC, Parkhill J, Guardabassi L. 2017. The secondary resistome of multidrug-resistant *Klebsiella pneumoniae*. *Sci Rep* 7:42483–42483.
8. Rahme L, Stevens E, Wolfort S, Shao J, Tompkins R, Ausubel F. 1995. Common virulence factors for bacterial pathogenicity in plants and animals. *Science* 268:1899.
9. Gellatly SL, Needham B, Madera L, Trent MS, Hancock RE. 2012. The *Pseudomonas aeruginosa* PhoP-PhoQ two-component regulatory system is induced upon interaction with epithelial cells and controls cytotoxicity and inflammation. *Infection and immunity* 80:3122–3131.
